# Supplementary material
Source: PubMed Central journal article supplement (PMC4988611)
Supplement: pnas.1600019113.sapp.pdf [file pnas.1600019113.sapp.pdf]

## Supporting Information Appendix

*Millennial-Scale Sustainability of the Chesapeake Bay Native American Oyster Fishery*  
TC Rick et al.

SI Text  
Figure S1  
Tables S1-S19

### **SI Text: Oyster Samples and Statistical Analysis**

Our research was designed to minimize the potential biases from sampling across the different datasets and time periods. The paleontological, archaeological, and modern samples are described in detail below. For the archaeological and paleontological samples, we were particularly cognizant of how the samples were collected and any potential effects from post-depositional processes (trampling, plowing, burrowing animals, etc.). As noted below, similar excavation procedures and bulk sampling were followed for these assemblages. Although there are broken shells in the archaeological samples, there are numerous complete small and large shells that show the full size spectrum is represented. The archaeological samples differ from the Pleistocene and modern samples in that they are all human-selected rather than natural accumulations.

**Archaeological Samples.** We excavated oysters from archaeological shell middens on the Rhode River and Fishing Bay, Maryland. To complement these data we reviewed published and unpublished accounts of oyster measurements reported by archaeologists and other researchers. We conducted a literature search for oyster measurements and also searched databases of unpublished reports at the Maryland Historical Trust, Crownsville, Maryland and the Department of Historic Resources, Virginia. We focused on Native American sites, but also include relevant contact period and historical sites that are from

Euro-American occupations. Only sites with large samples of measured oysters and clearly reported methods and size estimates were included in our study (Table S1-S2). Even if an average height was provided, data were excluded from our analysis if we could not discern the sample size, whether or not the sample was random, or the archaeological age of the sample. Many researchers reported height/length ratios, but did not present primary data on height or sample size and these were not included in our study. In virtually all cases, the only data provided were mean values and consequently those are entered as single data points on the Fig. 1 scatter plot and are described in Table S2.

We attempted to create a regression formula to estimate size from broken shells, but analysis of over 250 modern shells did not produce statistically reliable results. Potter (1) analyzed whole and fragmentary left valves from two sites on the Potomac River and in both cases fragmentary valves were less than 10% of the assemblage. Since our results provide a wide range of archaeological shell sizes from 10 to 189 mm, we are confident that the use of whole shell measurements provides a representative sample of oyster height. Tables S1-S2 provide the mean, sample size, and standard deviation for each site used in our study.

To build on this bay-wide synthesis, we conducted detailed diachronic analysis of oyster size in two watersheds, Fishing Bay and Rhode River. These are high resolution archaeological data representing between 3200 and 1500 years of human harvest of oysters. All measured oysters are whole left valves obtained from excavated contexts. No oysters from the surface of sites or outside of the units were measured or included in our analysis.

Fishing Bay is a small sub-estuary of the Transquaking River on the eastern shore of Maryland located in the mesohaline zone of Chesapeake Bay. About a dozen shell middens have been recorded in the Fishing Bay/Transquaking region dating between the Middle and Late Woodland from approximately 1500 to 400 cal BP (2-4). We excavated six of these shell middens, including excavation of 1 x 2 and 1 x 1 m units and smaller 25 x 25 cm column samples using a combination of 1/4-inch and 1/8-inch mesh screen. Radiocarbon dates for each of these sites are available in Table S18 and in Rick et al. (3).

The Rhode River estuary is located on the western shore of Chesapeake Bay south of Annapolis, Maryland and contains a number of smaller tributary creeks and streams. Some 50 shell middens have been documented in the Rhode and adjacent West Rivers and these sites date from the Early Woodland through the historic period (5). We focused our excavations at six sites following the same general procedures as the work at Fishing Bay. These sites date from ~3200 to 200 cal BP. All of the sites were deposited by Native Americans, except 18AN1323, which dates to the 19<sup>th</sup> century, has historical artifacts, and was deposited by EuroAmericans. Radiocarbon dates from Rhode River sites are available in Table S19 and in Rick et al. (5).

Because oyster size is just one measure of human predation effects, we also calculated an abundance index (6), which compares oysters to all other shellfish taxa by weight (grams). In the oyster index, values approaching 1 indicate a near exclusion of all other species. These data show that regardless of time period oysters provide over 90% of all shellfish and never decline in relative abundance (Figure S1). This is a common pattern in the Chesapeake Bay where, after about 2000 years ago, oysters dominate

nearly all shellfish assemblages, with slightly greater taxonomic richness at some earlier sites (including *Tagelus plebius*, *Mercenaria mercenaria*, *Mya arenaria*; 7).

We cannot rule out that archaeological oysters were transported from other watersheds by Native Americans, and particularly Colonial and historic inhabitants; however, a study of the potential for human transport of archaeological freshwater mussel shell from the southeastern USA demonstrated that long-distance prehistoric shell transport was not significant (8).

**Pleistocene Samples.** We compiled data from three Pleistocene localities in Maryland (Wailes Bluff) and Virginia (Holland Point, Cherry Point). Oyster length was measured from museum collections (Virginia Museum of Natural History, Martinsville, Virginia) for Wailes Bluff and Cherry Point, and field collections for Holland Point. The Pleistocene samples were from natural reefs and all sites were sampled using a bulk sampling strategy and sieved using a 4 mm mesh size, in which all material (regardless of size and condition) is retained for analysis. Compaction was limited and 95% of the assemblage had oysters of all sizes still preserved intact and in life position.

Paleotemperature estimates vary from a few degrees colder for Holland Point to a few degrees warmer for Wailes Bluff and Cherry Point than today. These data suggest that temperature was not likely a driving factor in larger Pleistocene oyster size in our sample.

The middle Pleistocene (0.781 – 0.126Ma) site is located at Cherry Point, Virginia, close to the mouth of the Rappahannock River (37°30'N, 76°24'W). This site exposes the Shirley Formation, which is a silty fine-grained sand and sandy silt containing *C. virginica*, *Mulinia*, *Noetia*, *Mercenaria*, and other mollusks (9).

Wailes Bluff in Maryland and Holland Point in Virginia are both late Pleistocene (0.126Ma – 13,000 years ago) sites. Wailes Bluff is located in St. Mary's County, Maryland, at the mouth of the Potomac River (38°04' N, 76°22' W) and oysters are exposed from the Lynnhaven Member of the Tabb Formation, which is composed of clayey and silty fine sand and sandy silt (9). Holland Point occurs on the south bank of the Piankatank River, near Dutton, Virginia (37°30'N and 76°26'W). Amino acid racemization of *Mercenaria* shells places it within the Tabb Formation (10), which is composed locally of clayey and sandy silt.

**Modern Samples.** The modern oyster size data for this study came from three general areas that vary in salinity, harvest level, disease, and management activities: upper and lower Chesapeake Bay, and the Virginia coastal bays. All of these measurements represent live oysters collected from extant reefs during biological surveys. Some of these samples exclude juvenile oysters/spat <35 mm.

Size distributions of oysters in the upper Chesapeake Bay sample (Maryland waters of the Chesapeake Bay and its subestuaries) were calculated from samples collected from 43 oyster bars sampled with oyster dredges as part of the Maryland Department of Natural Resources (MD-DNR) annual fall surveys (11; data provided by M. Tarnowski, MD-DNR). These low to moderate salinity sites were sampled during 2010 through 2014 throughout Maryland waters. At each bar, two 0.5-bushel subsamples were collected from replicate dredge tows and, for the purpose of the analysis presented here, can be considered to be random samples of oysters from each bar. All live oysters that were not young of year based on morphology were included in the MD-DNR

sampling, and oyster height was measured to the nearest mm.

The lower Chesapeake Bay samples are from the James, Piankatank, and Wicomico Rivers in Virginia with salinity ranging from 5 to 20 ppt collected during Fall (2010-2014) stock assessments in stratified random samples (see 12-15 for data and additional discussion of survey methods and results). Finally, the Virginia coastal bay samples are from four sites with patches that were randomly selected (R1-9, R2-4, R4-2 and R5-1 as described in 16) in the Virginia coastal bays with salinity of  $29 \pm 4$  SD (17).

**Statistical Analysis.** Statistical analyses were performed in R v3.2.3. The Shapiro-Wilk normality test (p-value cutoff of 0.05) and quantile-quantile plots for each time period showed that shell height measurements were non-normally distributed. To explore the effects of different sample sizes on our results, median oyster height was bootstrapped using the R library *boot* with 195 measurements and 1000 replicates. Resulting biases in median oyster height were less than  $\sim 0.2$  mm except the Virginia coastal bays (-0.6 mm) and upper bay (0.4 mm) (Table S17), indicating that variability in sample sizes are not likely impacting analyses. To test whether samples from different time periods across the bay and within sub-estuaries (Fishing Bay and Rhode River) are derived from different populations, Kruskal-Wallis  $X^2$  tests were performed in R followed by pairwise post hoc Mann-Whitney tests (Tables S3-S14). We also conducted pairwise Kolmogorov-Smirnov tests as implemented in R to compare the distributions of oyster size among modern, historic, prehistoric, and Pleistocene deposits and between modern upper Bay and Virginia coastal bays. We adjusted *p*-values for multiple comparisons using a Bonferroni correction, when necessary.

We tested for the magnitude and statistical significance of Pearson's correlation coefficient to compare oyster height with salinity and distance-to-mouth (Table S16). For the Pearson's  $r$  statistic, values approaching 1 show a strong positive correlation, values approaching 0 show no correlation, and -1 show a strong negative correlation. The  $r^2$  statistic is only meaningful for samples with a statistically significant correlation. Values approaching 1 suggest that much of the variation in the  $y$  variable (oyster height) can be explained by the  $x$  variable (MAS or Distance).

### SI References

1. Potter SR (1982) *An Analysis of Chicacoan Settlement Patterns* (PhD Dissertation, University of North Carolina, Chapel Hill).
2. Lowery DL (2005) *Archaeological Survey of the Fishing Bay and Fairmount State Wildlife Management Areas, Dorchester and Somerset Counties, Maryland* (Washington College Public Archaeology Laboratory, Chestertown).
3. Rick TC, Lowery DL, Henkes GA, Wah JS (2011) A late Holocene radiocarbon chronology for the shell middens of Fishing Bay, Maryland. *Archaeol Eastern North Amer* 39: 153-167.
4. Reeder-Myers LA, Rick TC, Henkes G, Lowery D, Wah JS (2016) Human ecology and coastal foraging at Fishing Bay, Maryland, USA. *J Ethnobiol*, in press.
5. Rick TC, *et al.* (2014) Shell middens, cultural chronologies, and coastal settlement on the Rhode River Sub-estuary of Chesapeake Bay, Maryland, USA. *Geoarchaeology* 29:357-409.
6. Lyman RL (2009) *Quantitative Paleozoology* (Cambridge University Press).
7. Rick TC, Barber M, Lowery D, Wah J, Madden M (2015) Early Woodland coastal foraging at the Savage Neck Shell Midden (44NH478), Chesapeake Bay, Virginia. *Archaeol Eastern North Amer* 43:23-38.
8. Peacock E, Randklev CR, Wolverton S, Palmer RA, Zaleski S (2012) The "cultural filter", human transport of mussel shell, and the applied potential of zooarchaeological data. *Ecol Appl* 22:1446-1459.
9. Rader EK, Evans NH (1993) *Geologic map of Virginia; Expanded Explanation* (Virginia Division of Mineral Resources).
10. Kusnerik KM, Grant AN, Lockwood R (2013) Reconstructing the late Pleistocene paleoenvironment and population ecology of the eastern oyster (*Crassostrea virginica*) at Holland Point, Virginia. *Geol Soc Amer Abstr Progr* 45:65.
11. Tarnowski M (2012) Maryland Oyster Population Status Report - 2011 Fall Survey. MDNR Publ. No. 17-8152012-598 (Annapolis).  
<http://dnr2.maryland.gov/fisheries/Documents/2011FSreport.pdf>
12. [http://www.vims.edu/research/units/labgroups/molluscan\\_ecology/publications/report\\_s/annual/index.php](http://www.vims.edu/research/units/labgroups/molluscan_ecology/publications/report_s/annual/index.php)

13. Harding JM, Mann R, Southworth M, Wesson J (2010) Management of the Piankatank River, Virginia, in support of oyster (*Crassostrea virginica*, Gmelin 1791) fishery repletion. *J Shellfish Res* 29:1-22.
14. Mann R, Southworth M, Harding JM, Wesson J (2009) Population studies of the native oyster *Crassostrea virginica* (Gmelin) in the James River, Virginia, USA. *J Shellfish Res* 28:1-30
15. Southworth M, Harding JM, Mann R, Wesson J (2010) Oyster (*Crassostrea virginica* Gmelin 1791) population dynamics on public reefs in the Great Wicomico River, Virginia, USA. *J Shellfish Res* 29:271-290.
16. Ross PG, Luckenbach MW (2009) *Population Assessment of Eastern Oysters (Crassostrea virginica) in the Seaside Coastal Bays* (Final Report, Coastal Zone Management Program, Virginia Department of Environmental Quality, Richmond).
17. McGlathery K, Christian R, Blum L, Daniel D, Miller M, Spitler J, Overman K (2008) Water Quality of Virginia Coastal Bays - physical data 1992-2008. Virginia Coast Reserve Long-Term Ecological Research Project Data Publication knb-lter-vcr.76.26 (<http://www.vcrlter.virginia.edu/knb/metacat/knb-lter-vcr.76.26/lter> ).
18. Waselkov GA (1982) *Shellfish Gathering and Shell Midden Archaeology* (PhD Dissertation, University of North Carolina, Chapel Hill).
19. Catts WP, *et al.* (1999) *Phase III Data Recovery Investigations at 18CV362, Ashcomb's Quarter (Historic component) and Awapantop (prehistoric component), Solomons Naval Recreation Center, Solomons, Calvert County, Maryland* (Report prepared for Calvert Soil Conservation District, on file with the Maryland Historical Trust, Crownsville).
20. Traver JD (1995) *Phase III Archaeological Data Recovery at Site 44SK20 City of Suffolk, Virginia* (Report prepared for Maguire Associates, Inc, on file with the Virginia Department of Historical Resources, Richmond).
21. Monroe EJ, Goodrich K, Jones JB (2012) "*They Live Much Upon Oysters Getting Vast Quantities of 'em and So Roast 'em in a Fire*": *Archaeological Data Recovery at Site 44WM0304, Associated with the Route 205 project, Westmoreland County, Virginia* (Report prepared for the Virginia Department of Transportation, on file with the Virginia Department of historical Resources, VDHR File No. 2008-0076).
22. Cultural Resources, Inc (2006) *Phase III Archaeological Data Recovery at Sites 44PM0012 and 44PM0013, APM Terminals, City of Portsmouth, Virginia* (Report prepared for Williamsburg Environmental Group, on file with the Virginia Department of Historical Resources, VDHR File No. 2002-1371).
23. Jenkins, JA (2013) Truly long-term sustainability: an archaeological analysis of oyster shell. *The Third World Sustainability Forum*. <http://www.sciforum.net/conference/wsf3>
24. Bronk Ramsey C (2009) Bayesian analysis of radiocarbon dates. *Radiocarbon* 51:337-360.
25. Bronk Ramsey C (2013) OxCal 4.2. <http://c14.arch.ox.ac.uk/>.
26. Rick TC, Henkes GA, Lowery DL, Colman SM, Culleton BJ (2012) Marine radiocarbon reservoir corrections ( $\Delta R$ ) for Chesapeake Bay and Middle Atlantic coastal North America. *Quat Res* 77:205-210.
27. Rick TC, Henkes G (2014) Radiocarbon variability in *Crassostrea virginica* shells from the Chesapeake Bay. *Radiocarbon* 56:1-7.



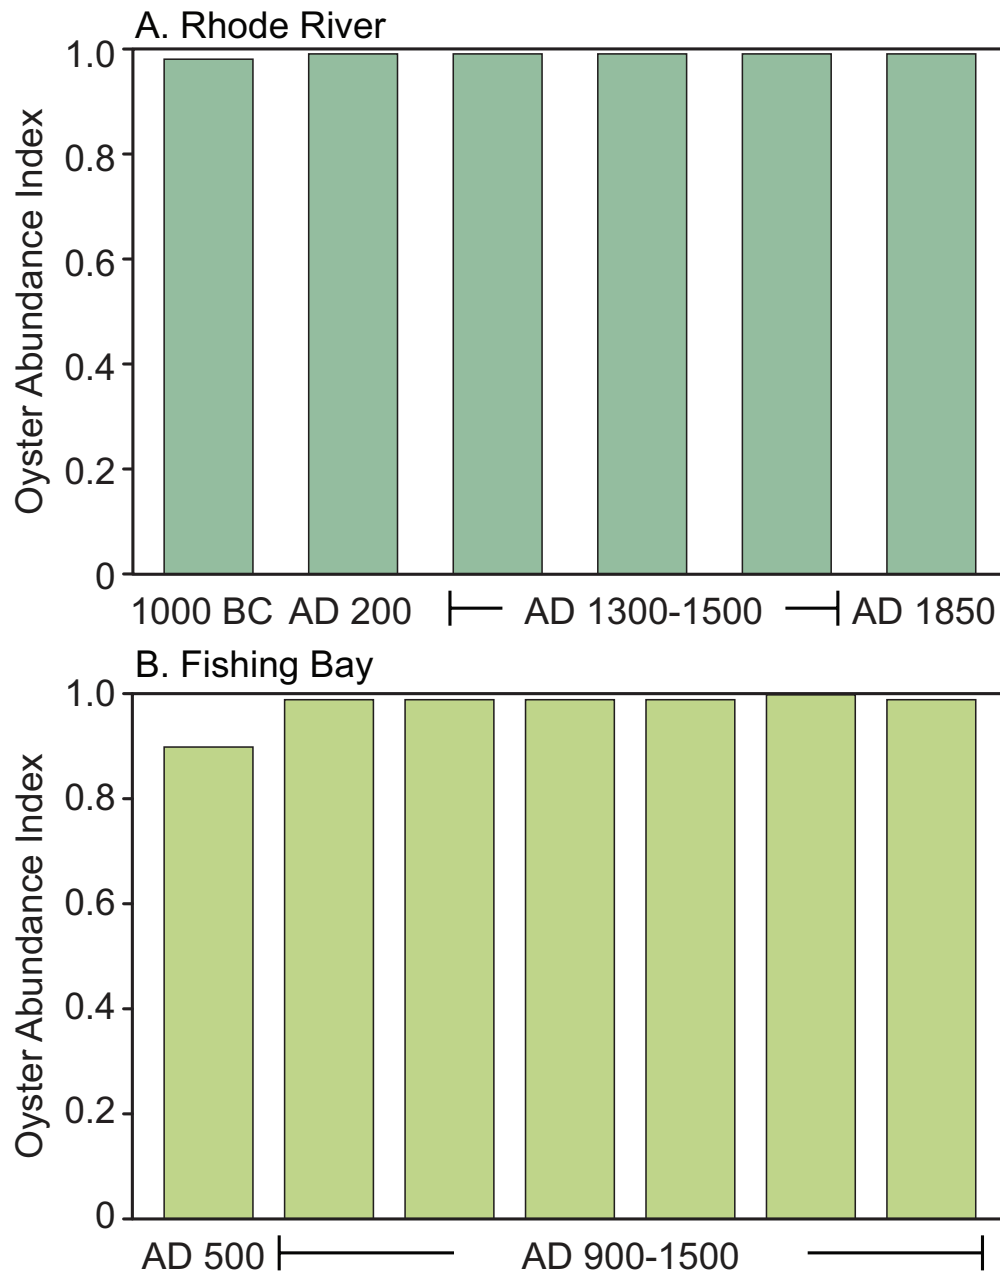

Fig. S1. Abundance index for oysters compared to all other shellfish in archaeological shell middens through time (measured by weight). A. Rhode River sites in Figure 3 and B. Fishing Bay sites in Figure 3. Values approaching 1 indicate that oysters are present to the near exclusion of all other species. All site values are above 0.9 (90-99 percent) of the assemblage. These data demonstrate that oysters are the most abundant species to near exclusion at all sites regardless of time period and that there is no decline in oyster abundance at these middens through time. At the Fishing Bay site with 0.9 abundance, the next greatest taxon is *Tagelus plebius* (stout tagelus).

**Table S1. Summary of oyster measurements for each site.<sup>1</sup>**

|                                             | <b>Sample Size</b> | <b>Mean (mm)</b> | <b>Maximum (mm)</b> | <b>Standard Dev. (mm)</b> |
|---------------------------------------------|--------------------|------------------|---------------------|---------------------------|
| <b>Pleistocene</b>                          | <b>621</b>         | <b>87</b>        | <b>259</b>          | <b>38.7</b>               |
| <b>Middle Pleistocene</b>                   | <b>36</b>          | <b>92</b>        | <b>138</b>          | <b>28.0</b>               |
| <b>Cherry Point</b>                         | 36                 | 92               | 138                 | 28.0                      |
| <b>Late Pleistocene</b>                     | <b>585</b>         | <b>86</b>        | <b>259</b>          | <b>39.3</b>               |
| <b>Holland Point</b>                        | 549                | 85               | 259                 | 39.6                      |
| <b>Wailes Bluff</b>                         | 36                 | 100              | 197                 | 31.5                      |
| <b>Prehistoric</b>                          | <b>6648</b>        | <b>72</b>        | <b>189</b>          | <b>20.1</b>               |
| <b>Early Woodland</b>                       | <b>469</b>         | <b>61</b>        | <b>112</b>          | <b>14.8</b>               |
| <b>18AN308 (1090-850 BC)</b>                | 469                | 61               | 112                 | 14.8                      |
| <b>Middle Woodland</b>                      | <b>571</b>         | <b>70</b>        | <b>189</b>          | <b>19.9</b>               |
| <b>18AN285 (AD 550-680)</b>                 | 390                | 63               | 189                 | 15.9                      |
| <b>18DO130MW (AD 340-990)</b>               | 181                | 83               | 153                 | 21.1                      |
| <b>Late Woodland</b>                        | <b>5608</b>        | <b>74</b>        | <b>176</b>          | <b>20.2</b>               |
| <b>Fishing Bay</b>                          | <b>2438</b>        | <b>84</b>        | <b>176</b>          | <b>22.0</b>               |
| <b>18DO127 (AD 860-1320)</b>                | 952                | 84               | 176                 | 24.3                      |
| <b>18DO130LW (AD 1050-1270)</b>             | 117                | 81               | 138                 | 21.1                      |
| <b>18DO35 (AD 1010-1490)</b>                | 307                | 79               | 137                 | 17.5                      |
| <b>18DO429 (AD 830-1160)</b>                | 418                | 79               | 137                 | 20.5                      |
| <b>18DO436 (AD 900-1170)</b>                | 81                 | 77               | 116                 | 20.7                      |
| <b>18DO439 (AD 890-1130)</b>                | 563                | 90               | 158                 | 19.7                      |
| <b>Rhode River</b>                          | <b>3170</b>        | <b>66</b>        | <b>146</b>          | <b>14.7</b>               |
| <b>18AN226 (AD 1300-1480)</b>               | 180                | 56               | 112                 | 14.9                      |
| <b>18AN285 (AD 1430-1590)</b>               | 750                | 66               | 115                 | 14.3                      |
| <b>18AN286 (AD 1340-1520)</b>               | 1357               | 64               | 139                 | 14.6                      |
| <b>18AN287 (AD 1290-1510)</b>               | 883                | 71               | 146                 | 13.7                      |
| <b>Historic</b>                             | <b>198</b>         | <b>81</b>        | <b>156</b>          | <b>20.1</b>               |
| <b>18AN1323 (AD 1770-modern)</b>            | 198                | 81               | 156                 | 20.1                      |
| <b>Modern<sup>2</sup></b>                   | <b>23221</b>       | <b>72</b>        | <b>157</b>          | <b>19.7</b>               |
| <b>Upper Bay (MD DNR Sites)</b>             | 21486              | 73               | 157                 | 19.3                      |
| <b>VA Coastal Bays (VIMS Seaside Sites)</b> | 1735               | 55               | 130                 | 15.3                      |

<sup>1</sup>The minimum value for all oysters was set to 35 mm. Although this resulted in slightly larger average sizes (~1 mm or less), it had no effect on our interpretations and this made our data comparable across all datasets.

<sup>2</sup>As noted in the text, the modern Lower Chesapeake data were from size bins or groupings (e.g., 1-2 mm, 3-4, mm) rather than individual size classes. Consequently, these data were not incorporated into our detailed statistical analyses.

**Table S2. List of additional archaeological components that are included in Fig. 1.**

| Site    | Component/Age                                    | Average Height (mm) | Sample Size | Reference |
|---------|--------------------------------------------------|---------------------|-------------|-----------|
| 44WM119 | Late Archaic                                     | 57                  | 110         | 18        |
| 44WM119 | Early Woodland                                   | 59                  | 901         | 18        |
| 44WM119 | Middle Woodland                                  | 58                  | 394         | 18        |
| 44WM119 | Late Woodland                                    | 58                  | 2300        | 18        |
| 44WM119 | Protohistoric/Early historic                     | 59                  | 528         | 18        |
| 44NB147 | Protohistoric/Early historic                     | 57                  | 1151        | 18        |
| 18CV362 | AD 1300-1635                                     | 76                  | 85          | 19        |
| 18CV362 | AD 1720-1750 (Feature 16)                        | 99                  | 96          | 19        |
| 44SK20  | Middle Woodland (B2-B3)                          | 71                  | 208         | 20        |
| 44WM304 | 165 BC - AD 215                                  | 68                  | 9956        | 21        |
| 44PM13  | Middle Woodland                                  | 91                  | 358         | 22        |
| 44YO2   | Middle Woodland/Late Woodland I/Late Woodland II | 61/67/55            | 1152        | 23        |

**Table S3. Results of Kruskal-Wallis test and pairwise Mann-Whitney U comparing time periods.**

**Kruskal-Wallis chi-squared = 1613.7, df = 4, p-value < 2.2e-16**

| Time Period            | Pleistocene | Prehistoric | Historic | Modern Upper Bay |
|------------------------|-------------|-------------|----------|------------------|
| Prehistoric            | 1.14E-10    |             |          |                  |
| Historic               | 1.00        | 1.20E-09    |          |                  |
| Modern Upper Bay       | 5.46E-09    | 3.90E-08    | 2.35E-06 |                  |
| Modern VA Coastal Bays | 9.15E-75    | 4.61E-258   | 4.07E-58 | < 4.61E-258      |

  

| Adjusted P-value | 1-0.5 | 0.5-0.1 | 0.09-0.051 | 0.050-0.000 |
|------------------|-------|---------|------------|-------------|
|                  |       |         |            |             |

**Table S4. Effect size calculations from pairwise Mann-Whitney U comparing time periods.**

| Time Period            | Pleistocene | Prehistoric | Historic | Modern Upper Bay |
|------------------------|-------------|-------------|----------|------------------|
| Prehistoric            | 0.58        |             |          |                  |
| Historic               | 0.49        | 0.63        |          |                  |
| Modern Upper Bay       | 0.43        | 0.52        | 0.61     |                  |
| Modern VA Coastal Bays | 0.25        | 0.23        | 0.85     | 0.78             |

  

| Effect Size | 0.00-0.24 | 0.25-0.49 | 0.50-0.74 | 0.75-1 |
|-------------|-----------|-----------|-----------|--------|
|             |           |           |           |        |

**Table S5. Results of Kruskal-Wallis test and pairwise Mann-Whitney U comparing time periods.**

Kruskal-Wallis chi-squared = 1795.2, df = 7, p-value < 2.2e-16

| <i>Time Period</i>            | Middle Pleistocene | Late Pleistocene | Early Woodland | Middle Woodland | Late Woodland | Historic | Modern Upper Bay |
|-------------------------------|--------------------|------------------|----------------|-----------------|---------------|----------|------------------|
| Late Pleistocene              | 1.00               |                  |                |                 |               |          |                  |
| Early Woodland                | 6.76E-09           | 1.61E-19         |                |                 |               |          |                  |
| Middle Woodland               | 1.31E-05           | 2.15E-07         | 3.80E-10       |                 |               |          |                  |
| Late Woodland                 | 2.09E-04           | 1.48E-05         | 3.53E-38       | 3.19E-05        |               |          |                  |
| Historic                      | 0.058              | 1.00             | 1.07E-29       | 6.67E-12        | 5.26E-07      |          |                  |
| Modern Upper Bay<br>Modern VA | 1.85E-04           | 3.33E-06         | 3.42E-41       | 2.62E-06        | 1.00          | 6.57E-06 | < 4.61E-         |
| Coastal Bays                  | 1.04E-11           | 1.66E-67         | 4.94E-19       | 8.89E-62        | 5.16E-275     | 1.14E-57 | 258              |
| Adjusted P-value              | 1-0.5              | 0.5-0.1          | 0.09-0.051     | 0.050-0.000     |               |          |                  |

**Table S6. Effect size calculations from pairwise Mann-Whitney U comparing time periods.**

Effect Size

| <i>Time Period</i>            | Middle Pleistocene | Late Pleistocene | Early Woodland | Middle Woodland | Late Woodland | Historic | Modern Upper Bay |
|-------------------------------|--------------------|------------------|----------------|-----------------|---------------|----------|------------------|
| Late Pleistocene              | 0.43               |                  |                |                 |               |          |                  |
| Early Woodland                | 0.18               | 0.33             |                |                 |               |          |                  |
| Middle Woodland               | 0.75               | 0.60             | 0.38           |                 |               |          |                  |
| Late Woodland                 | 0.28               | 0.56             | 0.32           | 0.56            |               |          |                  |
| Historic                      | 0.34               | 0.50             | 0.22           | 0.67            | 0.62          |          |                  |
| Modern Upper Bay<br>Modern VA | 0.72               | 0.56             | 0.32           | 0.43            | 0.49          | 0.61     |                  |
| Coastal Bays                  | 0.85               | 0.74             | 0.64           | 0.73            | 0.78          | 0.85     | 0.78             |
| Effect Size                   | 0.00-0.24          | 0.25-0.49        | 0.50-0.74      | 0.75-1          |               |          |                  |

**Table S7. Results of Kruskal-Wallis test and pairwise Mann-Whitney U comparing Rhode River sites.**

Kruskal-Wallis chi-squared = 390.25, df = 6, p-value < 2.2e-16

| <i>Rhode River Sites</i> | 18AN1323 | 18AN226  | 18AN285LW  | 18AN285MW   | 18AN286  | 18AN287 |
|--------------------------|----------|----------|------------|-------------|----------|---------|
| 18AN226                  | 3.42E-29 |          |            |             |          |         |
| 18AN285LW                | 1.32E-21 | 3.03E-17 |            |             |          |         |
| 18AN285MW                | 8.74E-26 | 9.35E-08 | 1.75E-03   |             |          |         |
| 18AN286                  | 3.05E-30 | 4.10E-12 | 7.11E-04   | 1.00        |          |         |
| 18AN287                  | 1.13E-12 | 3.54E-31 | 2.55E-08   | 1.04E-17    | 7.35E-28 |         |
| 18AN308                  | 8.05E-30 | 2.19E-04 | 8.20E-09   | 0.82        | 3.92E-03 | 3.49E   |
| Adjusted P-value         | 1-0.5    | 0.5-0.1  | 0.09-0.051 | 0.050-0.000 |          |         |

**Table S8. Effect size calculations from pairwise Mann-Whitney U comparing Rhode River sites.**

| <i>Rhode River Sites</i> | Effect Size |         |           |           |         |         |
|--------------------------|-------------|---------|-----------|-----------|---------|---------|
|                          | 18AN1323    | 18AN226 | 18AN285LW | 18AN285MW | 18AN286 | 18AN287 |
| 18AN226                  | 0.84        |         |           |           |         |         |
| 18AN285LW                | 0.73        | 0.29    |           |           |         |         |
| 18AN285MW                | 0.77        | 0.35    | 0.57      |           |         |         |
| 18AN286                  | 0.76        | 0.33    | 0.55      | 0.48      |         |         |
| 18AN287                  | 0.67        | 0.22    | 0.41      | 0.34      | 0.36    |         |
| 18AN308                  | 0.78        | 0.39    | 0.61      | 0.54      | 0.56    | 0.69    |

Effect Size    0.00-0.24    0.25-0.49    0.50-0.74    0.75-1

**Table S9. Results of Kruskal-Wallis test and pairwise Mann-Whitney U comparing Fishing Bay sites.**

Kruskal-Wallis chi-squared = 102.12, df = 6, p-value < 2.2E-16

| <i>Fishing Bay Sites</i> | Kruskal-Wallis chi-squared = 102.12, df = 6, p-value < 2.2E-16 |          |           |           |          |          |
|--------------------------|----------------------------------------------------------------|----------|-----------|-----------|----------|----------|
|                          | 18DO35                                                         | 18DO127  | 18DO130LW | 18DO130MW | 18DO429  | 18DO436  |
| 18DO127                  | 1.00                                                           |          |           |           |          |          |
| 18DO130LW                | 1.00                                                           | 1.00     |           |           |          |          |
| 18DO130MW                | 1.00                                                           | 1.00     | 1.00      |           |          |          |
| 18DO429                  | 1.00                                                           | 0.02     | 1.00      | 0.19      |          |          |
| 18DO436                  | 1.00                                                           | 1.00     | 1.00      | 1.00      | 1.00     |          |
| 18DO439                  | 1.78E-13                                                       | 2.75E-09 | 2.67E-04  | 9.44E-04  | 4.10E-18 | 2.37E-05 |

Adjusted P-value    1-0.5    0.5-0.1    0.09-0.051    0.050-0.000

**Table S10. Effect size calculations from pairwise Mann-Whitney U comparing Fishing Bay sites.**

| <i>Fishing Bay Sites</i> | Effect Size |         |           |           |         |         |
|--------------------------|-------------|---------|-----------|-----------|---------|---------|
|                          | 18DO-35     | 18DO127 | 18DO130LW | 18DO130MW | 18DO429 | 18DO436 |
| 18DO127                  | 0.53        |         |           |           |         |         |
| 18DO130LW                | 0.55        | 0.49    |           |           |         |         |
| 18DO130MW                | 0.52        | 0.52    | 0.47      |           |         |         |
| 18DO429                  | 0.53        | 0.56    | 0.54      | 0.57      |         |         |
| 18DO436                  | 0.51        | 0.56    | 0.53      | 0.57      | 0.50    |         |
| 18DO439                  | 0.34        | 0.40    | 0.37      | 0.40      | 0.33    | 0.33    |

Effect Size    0.00-0.24    0.25-0.49    0.50-0.74    0.75-1

**Table S11. Results of Kruskal-Wallis test and pairwise Mann-Whitney U comparing levels in 18AN285.**

| Kruskal-Wallis chi-squared = 41.176, df = 6, p-value = 2.67E-07 |         |         |         |          |            |              |  |
|-----------------------------------------------------------------|---------|---------|---------|----------|------------|--------------|--|
| <i>18AN285</i>                                                  | Level 1 | Level 2 | Level 3 | Level 4  | Level 5    | Level 6      |  |
| Level 2                                                         | 1.00    |         |         |          |            |              |  |
| Level 3                                                         | 1.00    | 1.00    |         |          |            |              |  |
| Level 4                                                         | 0.50    | 1.00    | 0.21    |          |            |              |  |
| Level 5                                                         | 1.00    | 1.00    | 1.00    | 1.11E-03 |            |              |  |
| Level 6                                                         | 1.00    | 0.90    | 0.38    | 1.89E-08 | 0.57       |              |  |
| Level 7                                                         | 1.00    | 1.00    | 1.00    | 1.01E-03 | 1.00       | 1.00         |  |
| Adjusted P-value                                                | 1-0.5   |         |         | 0.5-0.1  | 0.09-0.051 | 0.050- 0.000 |  |

**Table S12. Effect size calculations from pairwise Mann-Whitney U comparing levels in 18AN285.**

| Effect Size    |           |         |           |           |         |         |  |
|----------------|-----------|---------|-----------|-----------|---------|---------|--|
| <i>18AN285</i> | Level 1   | Level 2 | Level 3   | Level 4   | Level 5 | Level 6 |  |
| Level 2        | 0.43      |         |           |           |         |         |  |
| Level 3        | 0.42      | 0.52    |           |           |         |         |  |
| Level 4        | 0.35      | 0.43    | 0.41      |           |         |         |  |
| Level 5        | 0.45      | 0.53    | 0.52      | 0.60      |         |         |  |
| Level 6        | 0.49      | 0.58    | 0.57      | 0.66      | 0.55    |         |  |
| Level 7        | 0.51      | 0.59    | 0.58      | 0.66      | 0.56    | 0.51    |  |
| Effect Size    | 0.00-0.24 |         | 0.25-0.49 | 0.50-0.74 | 0.75-1  |         |  |

**Table S13. Results of Kruskal-Wallis test and pairwise Mann-Whitney U comparing levels in 18AN1323.**

| Kruskal-Wallis chi-squared = 11.79, df = 5, p-value = 0.04 |         |         |         |            |              |  |
|------------------------------------------------------------|---------|---------|---------|------------|--------------|--|
| <i>18AN1323</i>                                            | Level 2 | Level 3 | Level 4 | Level 5    | Level 5/6    |  |
| Level 3                                                    | 1.00    |         |         |            |              |  |
| Level 4                                                    | 1.00    | 1.00    |         |            |              |  |
| Level 5                                                    | 0.06    | 0.10    | 1.00    |            |              |  |
| Level 5/6                                                  | 1.00    | 1.00    | 1.00    | 0.25       |              |  |
| Level 7                                                    | 1.00    | 1.00    | 1.00    | 1.00       | 1.00         |  |
| Adjusted P-value                                           | 1-0.5   |         | 0.5-0.1 | 0.09-0.051 | 0.050- 0.000 |  |

**Table S14. Effect size calculations from pairwise Mann-Whitney U comparing levels in 18AN1323.**

| <i>18AN1323</i> | Effect Size |         |         |         |           |
|-----------------|-------------|---------|---------|---------|-----------|
|                 | Level 2     | Level 3 | Level 4 | Level 5 | Level 5/6 |
| Level 3         | 0.49        |         |         |         |           |
| Level 4         | 0.60        | 0.60    |         |         |           |
| Level 5         | 0.70        | 0.70    | 0.55    |         |           |
| Level 5/6       | 0.53        | 0.51    | 0.41    | 0.35    |           |
| Level 7         | 0.60        | 0.60    | 0.47    | 0.40    | 0.55      |

  

|             |           |           |           |        |
|-------------|-----------|-----------|-----------|--------|
| Effect Size | 0.00-0.24 | 0.25-0.49 | 0.50-0.74 | 0.75-1 |
|-------------|-----------|-----------|-----------|--------|

**Table S15. Results of the Kolmogorov-Smirnov tests.**

| Time 1           | Time 2                 | N of Time 1 | N of Time 2 | D     | p-value   | p-value adjusted |
|------------------|------------------------|-------------|-------------|-------|-----------|------------------|
| Historic         | Prehistoric            | 198         | 6648        | 0.258 | 1.57 E-11 | 1.57 E-10        |
| Historic         | Pleistocene            | 198         | 621         | 0.204 | 7.76 E-06 | 7.76 E-05        |
| Historic         | Modern Upper Bay       | 198         | 21486       | 0.218 | 1.71E-08  | 1.71 E-07        |
| Historic         | Modern VA Coastal Bays | 198         | 1734        | 0.594 | <2.2 E-16 | 2.20 E-15        |
| Prehistoric      | Pleistocene            | 6648        | 621         | 0.266 | <2.2 E-16 | 2.20 E-15        |
| Prehistoric      | Modern Upper Bay       | 6648        | 21486       | 0.120 | <2.2 E-16 | 2.20 E-15        |
| Prehistoric      | Modern VA Coastal Bays | 6648        | 1734        | 0.427 | <2.2 E-16 | 2.20 E-15        |
| Pleistocene      | Modern Upper Bay       | 621         | 21486       | 0.287 | <2.2 E-16 | 2.20 E-15        |
| Pleistocene      | Modern VA Coastal Bays | 621         | 1734        | 0.451 | <2.2 E-16 | 2.20 E-15        |
| Modern Upper Bay | Modern VA Coastal Bays | 21486       | 1734        | 0.451 | <2.2 E-16 | 2.20 E-15        |

**Table S16. Statistical comparison of mean oyster height to mean annual salinity (MAS) and distance to the mouth of the bay (distance), including Pearson's correlation coefficient values (Pearson's r and associated P value) and the r<sup>2</sup> values for a simple linear regression. Upper Bay archaeological sites refer to our watershed samples in Fishing Bay and the Rhode River.**

| Sample                  | Sample Size | Oyster Height vs. MAS |         |                | Oyster Height vs. Distance |         |                |
|-------------------------|-------------|-----------------------|---------|----------------|----------------------------|---------|----------------|
|                         |             | Pearson's r           | P value | r <sup>2</sup> | Pearson's r                | P value | r <sup>2</sup> |
| All Sites               | 31          | 0.030                 | 0.8727  | 0.001          | -0.290                     | 0.1135  | 0.073          |
| Archaeological Sites    | 26          | 0.286                 | 0.1567  | 0.082          | -0.156                     | 0.4467  | 0.024          |
| Prehistoric Arch. Sites | 22          | 0.403                 | 0.0629  | 0.162          | -0.283                     | 0.2019  | 0.081          |
| Early Woodland Sites    | 3           | -0.986                | 0.1067  | 0.972          | 0.286                      | 0.8153  | 0.082          |
| Middle Woodland Sites   | 6           | 0.464                 | 0.3539  | 0.21           | -0.375                     | 0.4639  | 0.140          |
| Late Woodland Sites     | 13          | 0.368                 | 0.2160  | 0.135          | -0.251                     | 0.4081  | 0.063          |
| Upper Bay Arch. Sites   | 15          | 0.806                 | 0.0003  | 0.647          | -0.730                     | 0.0020  | 0.534          |

**Table S17. Results of bootstrap analysis to test for bias in sample sizes.**

| Time Period            | Sample Size | Median (mm) | Bootstrap median | Bias  | Std. Error |
|------------------------|-------------|-------------|------------------|-------|------------|
| Historic               | 198         | 80.2        | 80.4             | 0.04  | 1.20       |
| Prehistoric            | 6648        | 69.4        | 69.5             | 0.08  | 1.70       |
| Pleistocene            | 621         | 81.7        | 81.7             | 0.09  | 4.50       |
| Middle Pleistocene     | 36          | 93.5        | NA               | NA    | NA         |
| Late Pleistocene       | 585         | 80.2        | 80.3             | 0.19  | 4.53       |
| Early Woodland         | 469         | 59.0        | 59.0             | -0.02 | 1.18       |
| Middle Woodland        | 571         | 66.5        | 66.5             | 0.05  | 1.81       |
| Late Woodland          | 5608        | 70.5        | 70.5             | 0.00  | 1.68       |
| Modern Upper Bay       | 21486       | 72.0        | 72.0             | 0.42  | 1.87       |
| Modern VA Coastal Bays | 1735        | 52.0        | 52.0             | -0.60 | 1.31       |



**Table S18. Radiocarbon dates from archaeological sites in Fishing Bay used for the oyster analysis (see 3 for discussion).**

| Site                             | Provenience                         | Material                      | Sample #    | $\delta^{13}\text{C}$ | $^{14}\text{C}$ Age | Calibrated Age (2 $\sigma$ ) |
|----------------------------------|-------------------------------------|-------------------------------|-------------|-----------------------|---------------------|------------------------------|
| 18DO35                           | Unit 1, Middle of Unit, 21cmbs      | <i>C.v.</i>                   | OS-84255    | -1.55                 | 835 ± 40            | AD 1320-1490                 |
|                                  | Unit 1, Surface layer 5-7 cmbs      | <i>C.v.</i>                   | OS-81504    | -2.37                 | 845 ± 25            | AD 1330-1470                 |
|                                  | 26 cmbs base of Unit 2              | <i>C.v.</i>                   | OS-81512    | -2.15                 | 1180± 25            | AD 1040-1230                 |
|                                  | 25 cmbs base of midden              | <i>C.v.</i>                   | OS-79757    | -3.06                 | 1220 ± 30           | AD 1010-1200                 |
| 18DO127                          | Column 1, Middle of Unit, 10-cmbs   | <i>C.v.</i>                   | OS-84259    | -3.67                 | 1050 ± 25           | AD 1190-1320                 |
|                                  | Column 1, Top of Unit 5-10 cmbs     | <i>C.v.</i>                   | OS-81501    | -1.62                 | 1110 ± 40           | AD 1080-1300                 |
|                                  | Unit 2, Level 2 (30-40 cm)          | <i>C.v. t.</i>                | OS-102056   | -4.2                  | 1320 ± 25           | AD 900-1070                  |
|                                  | Column 1, Base of Unit, 44-cmbs     | <i>C.v.</i>                   | OS-81503    | -2.63                 | 1320 ± 35           | AD 880-1100                  |
|                                  | Unit 2, Level 2 (30-40 cm)          | <i>C.v. t.</i>                | OS-92436    | -3.15                 | 1350 ± 30           | AD 860-1050                  |
| 18DO130                          | Intertidal Pit Feature              | <i>C.v.</i>                   | OS-81500    | -5.46                 | 1730 ± 25           | AD 480-670                   |
|                                  | Pit features, Sample 2              | <i>C.v. t.</i>                | OS-92434    | -2.71                 | 1800 ± 25           | AD 420-610                   |
|                                  | Pit features, Sample 2              | <i>C.v. t.</i>                | OS-92435    | -2.45                 | 1870 ± 30           | AD 780-990                   |
|                                  | Upper deposit, possible pit feature | <i>C.v.</i>                   | OS-79759    | -2.04                 | 1140 ± 25           | AD 1070-1270                 |
|                                  | Unit 2 base of midden, 13 cmbs      | <i>C.v.</i>                   | OS-81509    | -1.49                 | 1170 ± 25           | AD 1050-1240                 |
|                                  | Base of Unit 2                      | Charcoal                      | OS-81228    | -                     | 1120 ± 25           | AD 780-990                   |
|                                  | Pit feature, 10 cm                  | <i>C.v.</i>                   | OS-94972    | -1.44                 | 1860 ± 35           | AD 340-580                   |
|                                  | Pit feature, 10 cm                  | <i>C.v.</i>                   | OS-95091    | -1.11                 | 1860 ± 25           | AD 350-560                   |
|                                  | Pit feature, 10 cm                  | <i>C.v.</i>                   | OS-95092    | -1.18                 | 1800 ± 25           | AD 420-610                   |
|                                  | Pit feature, 10 cm                  | <i>C.v.</i>                   | OS-95093    | -0.9                  | 1770 ± 25           | AD 440-640                   |
|                                  | 18DO429                             | Unit 1, Top of unit, 3-6 cmbs | <i>C.v.</i> | OS-84260              | -2.6                | 1280 ± 25                    |
| Unit 1, 10-20 cm                 |                                     | <i>C.v. t.</i>                | OS-92437    | -3.63                 | 1300 ± 25           | AD 910-1100                  |
| Unit 1, 10-20 cm                 |                                     | <i>C.v. t.</i>                | OS-92447    | -2.66                 | 1310 ± 30           | AD 900-1100                  |
| Unit 1, Base of Unit, 20-25 cmbs |                                     | <i>C.v.</i>                   | OS-84257    | -2.63                 | 1390 ± 25           | AD 820-1020                  |
| Auger north of Unit, ~100cmbs    |                                     | <i>C.v.</i>                   | OS-84256    | -2.45                 | 1750 ± 25           | AD 460-660                   |
| Unit 1, Stratum 1                |                                     | <i>C.v.</i>                   | OS-95094    | -3.68                 | 1270 ± 25           | AD 970-1160                  |
| Unit 1, Stratum 1                |                                     | <i>C.v.</i>                   | OS-95095    | -1.96                 | 1370 ± 30           | AD 830-1040                  |
| Unit 1, Stratum 1                |                                     | <i>C.v.</i>                   | OS-95096    | -2.88                 | 1320 ± 25           | AD 900-1070                  |
| Unit 1, Stratum 1                |                                     | <i>C.v.</i>                   | OS-95096    | -3.29                 | 1340 ± 25           | AD 890-1050                  |
| Unit 1, Stratum 1                |                                     | <i>C.v.</i>                   | OS-101201   | -2.82                 | 1350 ± 25           | AD 870-1050                  |
| 18DO436                          | Surface                             | <i>C.v. t.</i>                | OS-104719   | -3.91                 | 1260 ± 25           | AD 980-1170                  |
|                                  | unit 1 Bulk sample, lower deposit   | <i>C.v.</i>                   | OS-81510    | -2.49                 | 1270 ± 25           | AD 970-1160                  |
|                                  | Surface                             | <i>C.v. t.</i>                | OS-92579    | -3.02                 | 1290 ± 25           | AD 930-1130                  |
|                                  | Unit 2, lower level                 | <i>C.v.</i>                   | OS-81507    | -2.18                 | 1310 ± 25           | AD 900-1080                  |
| 18DO439                          | Unit 1, Top of Midden, 10-11 cmbs   | <i>C.v.</i>                   | OS-81506    | -1.51                 | 1290 ± 25           | AD 930-1130                  |

**Table S18 Continued.**

|                                        |             |          |       |           |             |
|----------------------------------------|-------------|----------|-------|-----------|-------------|
| East locus, 20-23 cmbs, base of midden | <i>C.v.</i> | OS-81511 | -0.48 | 1320 ± 25 | AD 900-1070 |
| 22 cmbs, base of midden                | <i>C.v.</i> | OS-79758 | -1.8  | 1330 ± 30 | AD 890-1070 |

Notes: *C.v.*= *Crassostrea virginica*; *C.v. t.*= oyster shell temper from pottery; OS = National Ocean Sciences Accelerator Mass Spectrometry Lab, Woods Hole Oceanographic Institute. All dates were calibrated using OxCal v 4.2 (24,25). Dates from marine organisms were corrected for the marine radiocarbon reservoir using  $\Delta R = -88 \pm 23$ , from Rick et al. (26). Some shells from 18DO130 and 18DO429 were sampled multiple times to investigate intrashell variability in radiocarbon (27). \*Note that sample OS-81228 from 18DO130 is from charcoal located just below the midden, and may not be associated with the human occupation.

**Table S19. Radiocarbon dates from the archaeological sites on the Rhode River Estuary used for the oyster analysis (see 5 for a discussion).**

| Site     | Provenience                      | Material <sup>1</sup> | Sample # | $\delta^{13}\text{C}$ | <sup>14</sup> C Age | Calibrated Age (2 $\sigma$ ) <sup>2</sup> |
|----------|----------------------------------|-----------------------|----------|-----------------------|---------------------|-------------------------------------------|
| 18AN226  | Bulk Sample 1, ~20cmbs           | <i>C.v.</i>           | OS-90147 | -3.76                 | 1030 ± 40           | AD 1330-1480                              |
|          | Bulk Sample 2, ~20cmbs           | <i>C.v.</i>           | OS-90143 | -3.57                 | 1100 ± 30           | AD 1300-1430                              |
|          | Probe, 32-34 cmbs base of midden | <i>C.v.</i>           | OS-84252 | -5.07                 | 1180 ± 20           | AD 1250-1390                              |
| 18AN285  | Unit 1c.s., 41-44cmbs            | <i>C.v.</i>           | OS-90323 | -3.67                 | 910 ± 30            | AD 1440-1590                              |
|          | Unit 1c.s., 5 cmbs               | <i>C.v.</i>           | OS-90153 | -3.27                 | 930 ± 25            | AD 1430-1540                              |
|          | Unit 1c.s., 70-71 cmbs           | <i>C.v.</i>           | OS-90145 | -3.56                 | 1890 ± 25           | AD 550-680                                |
| 18AN286  | Aug 3, 43cmbs                    | <i>C.v.</i>           | OS-90148 | -3.66                 | 2210 ± 25           | AD 150-360                                |
|          | Unit 1c.s., 30cmbs               | <i>C.v.</i>           | OS-90154 | -3.91                 | 950 ± 25            | AD 1430-1520                              |
|          | Unit 1, Level 4                  | <i>C.v. t.</i>        | OS-92581 | -5.03                 | 950 ± 25            | AD 1430-1520                              |
| 18AN287  | 25 cm, base of deep exposure     | <i>C.v.</i>           | OS-90146 | -3.54                 | 1000 ± 35           | AD 1350-1500                              |
|          | Unit 1, Level 4                  | <i>C.v. t.</i>        | OS-92433 | -3.83                 | 1040 ± 25           | AD 1340-1470                              |
|          | Creek exposure, 25cmbs           | <i>C.v.</i>           | OS-86708 | -3.19                 | 2020 ± 25           | AD 400-570                                |
| 18AN287  | Unit 2, 66cmbs                   | <i>C.v.</i>           | OS-90141 | -3.4                  | 985 ± 25            | AD 1400-1500                              |
|          | Unit 1, 55-58 cmbd               | <i>C.v.</i>           | OS-90144 | -4.22                 | 990 ± 30            | AD 1360-1510                              |
|          | 20 cmbs in creek exposure        | <i>C.v.</i>           | OS-86704 | -3.86                 | 1110 ± 25           | AD 1300-1420                              |
| 18AN308  | Unit 1, 65cmbd                   | <i>C.v.</i>           | OS-90142 | -4.1                  | 1120 ± 30           | AD 1290-1420                              |
|          | Unit 1 South, Level 1            | <i>C.v. t.</i>        | OS-92432 | -4.91                 | 1390 ± 25           | AD 1040-1200                              |
|          | Unit 1 South, Level 1            | <i>C.v. t.</i>        | OS-92908 | -4.54                 | 1510 ± 45           | AD 860-1110                               |
| 18AN308  | Unit 1, 35 cmbd, pair1           | Charcoal              | OS-98286 | -25.65                | 2760 ± 20           | 970-840 BC                                |
|          | Unit 2, 31 cmbd, pair2           | Charcoal              | OS-98285 | -24.81                | 2900 ± 20           | 1190-1010 BC                              |
|          | C.S. 1, 42-43 cmbd               | <i>C.v.</i>           | OS-98202 | -2.81                 | 3150 ± 20           | 950-800 BC                                |
| 18AN308  | Unit 1, 35 cmbd, pair1           | <i>C.v.</i>           | OS-98206 | -3.17                 | 3210 ± 20           | 1030-840 BC                               |
|          | Unit 2, 31 cmbd, pair2           | <i>C.v.</i>           | OS-98207 | -3.96                 | 3230 ± 20           | 1060-870 BC                               |
|          | 20 cmbs in creek exposure        | <i>C.v.</i>           | OS-92427 | -3.54                 | 3240 ± 25           | 1090-880 BC                               |
| 18AN308  | STP2, 33cmbs                     | <i>C.v.</i>           | OS-98204 | -1.83                 | 3250 ± 20           | 1090-890 BC                               |
|          | C.S. 1, 16-18 cmbd               | <i>C.v.</i>           | OS-98203 | -3.74                 | 3250 ± 20           | 1090-890 BC                               |
|          | Creek bed exposure, in situ      | <i>C.v.</i>           | OS-90320 | -2.23                 | 3360 ± 30           | 1250-1020 BC                              |
| 18AN1323 | Base of Unit 69-70 cmbs          | <i>C.v.</i>           | OS-84217 | -3.98                 | 465 ± 30            | AD 1850-1950                              |
|          | Top of Unit, 10-13 cmbs          | <i>C.v.</i>           | OS-84216 | -4.97                 | 550 ± 25            | AD 1770-1950                              |

Notes: *C.v.*= *Crassostrea virginica*; *C.v.t.*= *Crassostrea virginica* shell temper; Char=Charcoal. All dates calibrated using OxCal 4.2 (24,25) and applying a standard reservoir correction of  $97 \pm 18$  years for all marine shells (5).
